# Supplementary material
Source: publisher figshare collection journal article supplement (https://acs.figshare.com/ndownloader/files/3615435)
Supplement: Supplementary file 1 [file 3615435]

## **Supplemental Material A: Description of the gas chromatograph systems and calibration gases.**

Three GCs (Perkin Elmer Autosystem) and columns allow the stable intermediate species to be identified and quantified. GC-OHC (GC2) uses a flame ionization detector (FID) with a Varian CP-Porabond Q capillary column to target oxygenated species. GC-C5 (GC3) uses a FID with a Varian CP-Al<sub>2</sub>O<sub>3</sub>/Na<sub>2</sub>SO<sub>4</sub> capillary column to target species smaller than C<sub>5</sub>. GC-C10 uses a FID with a Restek RTX-1 capillary column to target species smaller than C<sub>10</sub> and some oxygenated species. Helium was used as the carrier gas in all the GCs. High-purity gases were used to calibrate for methane (CH<sub>4</sub>, Cryogenic Gases, chemically pure, 99%), ethyne (C<sub>2</sub>H<sub>2</sub>, Praxair, dissolved), ethane (C<sub>2</sub>H<sub>6</sub>, Cryogenic Gases, chemically pure, 99.0%), ethene (C<sub>2</sub>H<sub>4</sub>, Matheson, chemically pure, 99.5%), propane (C<sub>3</sub>H<sub>8</sub>, Cryogenic Gases, instrument grade, 99.5%), propene (C<sub>3</sub>H<sub>6</sub>, Cryogenic Gases, polymer grade, 99.5%), and 1-butene (1-C<sub>4</sub>H<sub>8</sub>, Cryogenic Gases, 99%). Calibrations were also determined using vapor from liquid methanol (CH<sub>3</sub>OH, Sigma Aldrich, ACS spectrophotometric grade, ≥99.9%), ethanal (CH<sub>3</sub>CHO, Fluka, puriss. p.a., anhydrous, >99.5% GC grade, ≤0.5% free acid CH<sub>3</sub>CHO), ethanol (C<sub>2</sub>H<sub>5</sub>OH, Sigma Aldrich, 200 proof, anhydrous, ≥99.5%), butanal (*n*-C<sub>4</sub>H<sub>7</sub>OH, Sigma Aldrich, puriss., ≥99.0%), but-3-en-1-ol (C<sub>4</sub>H<sub>7</sub>OH, Sigma Aldrich, 96%), and methyl *trans*-3-hexenoate (C<sub>7</sub>H<sub>12</sub>O<sub>2</sub>, Sigma Aldrich, 98%). Signals from the gas chromatographs were captured using a high-resolution data acquisition system (NI PXI 4472) at a rate of 8 Hz. Species were calibrated and quantified using the area under the response peak unless otherwise noted.
